# Supplementary material
Source: PubMed Central journal article supplement (PMC3279155)
Supplement: NIHMS340118-supplement-1_si_001.pdf [file NIHMS340118-supplement-1_si_001.pdf]

## Structure of (5'S)-8,5'-Cyclo-2'-Deoxyguanosine in DNA

### Supporting Information

Hai Huang,<sup>†</sup> Rajat S. Das,<sup>§</sup> Ashis K. Basu,<sup>§</sup> and Michael P. Stone<sup>\*†</sup>

<sup>†</sup> Department of Chemistry, Center in Molecular Toxicology, Center for Structural Biology, and the Vanderbilt-Ingram Cancer Center, Vanderbilt University, Nashville, Tennessee 37235

<sup>§</sup> Department of Chemistry, University of Connecticut, Storrs, Connecticut 06269

\* To whom Correspondence should be addressed: Michael P. Stone, Department of Chemistry, Vanderbilt University, VU Station B Box 351822, Nashville, TN 37235, Telephone 615-322-2589, FAX 615-322-7591, email: [michael.p.stone@vanderbilt.edu](mailto:michael.p.stone@vanderbilt.edu)

Telephone: 615-322-2589

Fax: 615-322-7591

Email: [michael.p.stone@vanderbilt.edu](mailto:michael.p.stone@vanderbilt.edu)

## Table of Contents

Complete Listing of Reference (77).

**Scheme S1.** Synthesis of phosphoramidite monomer for preparing oligonucleotide containing (5'*S*)-8,5'-cyclo-2'-deoxyguanosine.

**Table S1.** Chemical shifts of the non-exchangeable protons.

**Table S2.**  $^3J$  coupling constants and the pseudorotation of the deoxyribose

**Table S3.** NOE distance restraints used for the structural refinement

**Figure S1.**  $^{31}\text{P}$ -H3' HMBC spectrum

**Figure S2.** Nucleotide-by-nucleotide sixth-root residuals ( $R_1^x$ ).

**Figure S3.** Backbone torsion angles of the refined structure of the *S*-cdG containing duplex.

**Figure S4.** Base pairing and base stacking helicoidal parameters of the refined structure of the *S*-cdG containing duplex.

**Figure S5.** Calculated electrostatic potentials for the *S*-cdG nucleotide.

Complete listing of Reference (77).

- (77) Frisch, M. J.; Trucks, G. W.; Schlegel, H. B.; Scuseria, G. E.; Robb, M. A.; Cheeseman, J. R.; Montgomery, J. A.; Vreven, T.; Kudin, K. N.; Burant, J. C.; Millam, J. M.; Iyengar, S. S.; Tomasi, J.; Barone, V.; Mennucci, B.; Cossi, M.; Scalmani, G.; Rega, N.; Petersson, G. A.; Nakatsuji, H.; Hada, M.; Ehara, M.; Toyota, K.; Fukuda, R.; Hasegawa, J.; Ishida, M.; Nakajima, T.; Honda, Y.; Kitao, O.; Nakai, H.; Klene, M.; Li, X.; Knox, J. E.; Hratchian, H. P.; Cross, J. B.; Adamo, C.; Jaramillo, J.; Gomperts, R.; Stratmann, R. E.; Yazyev, O.; Austin, A. J.; Cammi, R.; Pomelli, C.; Pomelli, J.; Ochterski, W.; Ayala, P. Y.; Morokuma, K.; Voth, G. A.; Salvador, P.; Dannenberg, J. J.; Zakrzewska, V. G.; Daniels, A. D.; Farkas, O.; Rabuck, A. D.; Raghavachari, K.; Ortiz, J. V. *Gaussian, Inc., Wallingford, CT 2004.*

**Synthesis of phosphoramidite monomer of (5'S)-8,5'-cyclo-2'-deoxyguanosine****Scheme S1**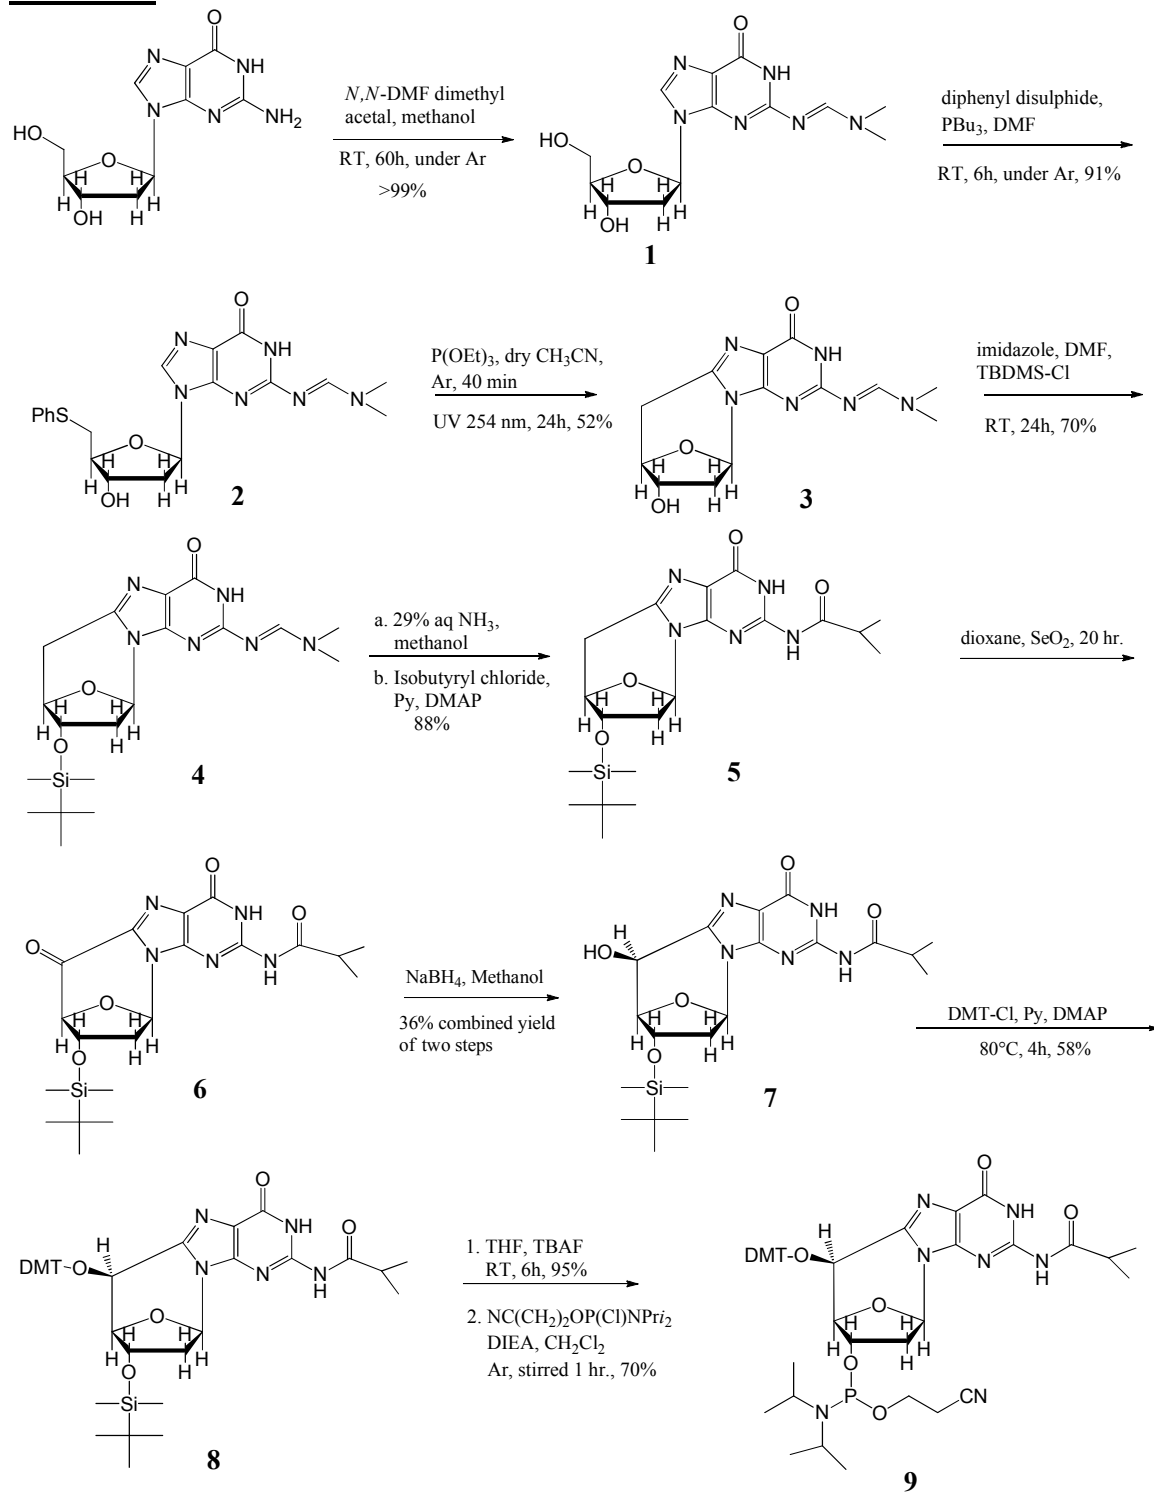

**Table S1.** Chemical Shifts (ppm) of the Non-exchangeable Protons of the *S*-cdG Containing Duplex.

| Nucleotide      | H6/H8 | H2/H5/CH <sub>3</sub> | H1'  | H2'  | H2'' | H3'  | H4'  | H5'  |
|-----------------|-------|-----------------------|------|------|------|------|------|------|
| G <sup>1</sup>  | 8.00  |                       | 6.06 | 2.69 | 2.84 | 4.86 | 4.27 |      |
| T <sup>2</sup>  | 7.40  | 1.43                  | 6.00 | 2.22 | 2.59 | 4.96 | 4.29 |      |
| G <sup>3</sup>  | 7.91  |                       | 5.88 | 2.64 | 2.74 | 5.01 | 4.40 |      |
| C <sup>4</sup>  | 7.55  | 5.43                  | 6.12 | 2.22 | 3.44 | 5.01 | 4.40 |      |
| X <sup>5</sup>  |       |                       | 6.14 | 2.55 | 2.27 | 4.87 | 5.12 | 5.56 |
| T <sup>6</sup>  | 7.54  | 1.81                  | 6.08 | 2.31 | 2.71 | 4.91 | 4.36 |      |
| G <sup>7</sup>  | 7.78  |                       | 6.00 | 2.56 | 2.82 | 4.94 | 4.38 |      |
| T <sup>8</sup>  | 7.26  | 1.34                  | 6.03 | 2.15 | 2.61 | 4.89 | 4.28 |      |
| T <sup>9</sup>  | 7.47  | 1.63                  | 6.16 | 2.19 | 2.63 | 4.92 |      |      |
| T <sup>10</sup> | 7.33  | 1.74                  | 5.88 | 2.02 | 2.41 | 4.93 |      |      |
| G <sup>11</sup> | 8.01  |                       | 6.11 | 2.75 | 2.75 | 5.04 | 4.44 |      |
| T <sup>12</sup> | 7.47  | 1.67                  | 6.28 | 2.29 | 2.29 | 4.58 | 4.13 |      |
| A <sup>13</sup> | 8.21  |                       | 6.21 | 2.62 | 2.78 | 4.85 | 4.26 |      |
| C <sup>14</sup> | 7.43  | 5.52                  | 5.17 | 2.02 | 2.25 | 4.81 |      |      |
| A <sup>15</sup> | 8.23  |                       | 5.80 | 2.77 | 2.87 | 5.07 | 4.40 |      |
| A <sup>16</sup> | 8.15  |                       | 5.92 | 2.69 | 2.89 | 5.09 | 4.48 |      |
| A <sup>17</sup> | 8.07  | 7.58                  | 6.09 | 2.60 | 2.87 | 5.02 | 4.48 |      |
| C <sup>18</sup> | 7.17  | 5.18                  | 5.66 | 1.99 | 2.41 | 4.77 |      |      |
| A <sup>19</sup> | 7.97  |                       | 6.12 | 2.46 | 2.81 | 4.98 | 4.32 |      |
| C <sup>20</sup> | 7.18  | 5.15                  | 5.40 | 1.99 | 2.32 | 4.81 |      |      |
| G <sup>21</sup> | 7.81  |                       | 5.83 | 2.52 | 2.70 | 4.93 | 4.30 |      |
| C <sup>22</sup> | 7.34  | 5.37                  | 5.61 | 2.06 | 2.39 | 4.85 |      |      |
| A <sup>23</sup> | 8.27  |                       | 6.28 | 2.69 | 2.90 | 5.03 | 4.41 |      |

|          |      |      |      |      |      |      |      |  |
|----------|------|------|------|------|------|------|------|--|
| $C^{24}$ | 7.42 | 5.45 | 6.14 | 2.13 | 2.17 | 4.51 | 4.05 |  |
|----------|------|------|------|------|------|------|------|--|

**Table S2.**  $^3J$  Coupling Constants and the Deoxyribose Pseudorotation.

| Nucleotide      | $^3J_{\text{H1}'\text{-H2}'}$ (Hz) | $^3J_{\text{H1}'\text{-H2}''}$ (Hz) | $P$ ( $^\circ$ ) | $\tau_m$ ( $^\circ$ ) | pseudorotation |
|-----------------|------------------------------------|-------------------------------------|------------------|-----------------------|----------------|
| G <sup>1</sup>  | 7.4                                | 6.7                                 | 179.3            | 27.9                  | C2'-endo       |
| T <sup>2</sup>  | 9.6                                | 6.2                                 | 131.0            | 40.2                  | C1'-exo        |
| G <sup>3</sup>  | 9.5                                | 6.1                                 | 121.2            | 40.6                  | C1'-exo        |
| C <sup>4</sup>  | 10.7                               | 6.4                                 | 147.7            | 42.1                  | C2'-endo       |
| X <sup>5</sup>  | 2.6                                | 7.0                                 | 280.2            | 47.6                  | O4'-exo        |
| T <sup>6</sup>  | 9.1                                | 6.6                                 | 161.6            | 34.2                  | C2'-endo       |
| G <sup>7</sup>  | 8.9                                | 6.9                                 | 121.1            | 40.6                  | C1'-exo        |
| T <sup>8</sup>  | 9.4                                | 6.6                                 | 133.2            | 35.6                  | C1'-exo        |
| T <sup>9</sup>  | 9.4                                | 6.6                                 | 116.1            | 38.3                  | C1'-exo        |
| T <sup>10</sup> | 9.2                                | 7.1                                 | 118.8            | 37.9                  | C1'-exo        |
| G <sup>11</sup> | 8.5                                | 6.2                                 | 145.0            | 35.6                  | C2'-endo       |
| G <sup>12</sup> | 7.5                                | 6.7                                 | 58.9             | 41.0                  | C4'-exo        |
| A <sup>13</sup> | 8.9                                | 6.0                                 | 167.9            | 29.3                  | C2'-endo       |
| C <sup>14</sup> | 9.6                                | 5.7                                 | 124.8            | 40.8                  | C1'-exo        |
| A <sup>15</sup> | 9.7                                | 6.2                                 | 151.1            | 33.5                  | C2'-endo       |
| A <sup>16</sup> | 10.0                               | 6.1                                 | 121.9            | 36.7                  | C1'-exo        |
| A <sup>17</sup> | 9.7                                | 6.3                                 | 139.2            | 36.3                  | C1'-exo        |
| C <sup>18</sup> | 8.6                                | 6.5                                 | 116.0            | 40.6                  | C1'-exo        |
| A <sup>19</sup> | 8.9                                | 6.7                                 | 125.5            | 37.7                  | C1'-exo        |
| C <sup>20</sup> | 10.2                               | 6.0                                 | 131.7            | 44.5                  | C1'-exo        |
| G <sup>21</sup> | 9.0                                | 6.4                                 | 164.4            | 34.3                  | C2'-endo       |
| C <sup>22</sup> | 9.0                                | 6.6                                 | 138.8            | 33.2                  | C1'-exo        |
| A <sup>23</sup> | 8.6                                | 6.5                                 | 144.8            | 33.6                  | C2'-endo       |
| C <sup>24</sup> | 7.7                                | 7.1                                 | 96.6             | 38.9                  | O4'-endo       |

**Table S3.** NOE Distance Restraints Used for the Structural Refinement.

| Nucleotide I |     | Atom I | Nucleotide II |     | Atom II | Lower bound (Å) | Upper bound (Å) |
|--------------|-----|--------|---------------|-----|---------|-----------------|-----------------|
| 1            | DG5 | H2''   | 1             | DG5 | H1'     | 1.95            | 2.47            |
| 1            | DG5 | H2'    | 1             | DG5 | H1'     | 2.19            | 3.97            |
| 1            | DG5 | H3'    | 1             | DG5 | H1'     | 3.94            | 4.44            |
| 1            | DG5 | H3'    | 1             | DG5 | H2''    | 2.78            | 4.49            |
| 1            | DG5 | H3'    | 1             | DG5 | H2'     | 2.12            | 2.67            |
| 1            | DG5 | H8     | 1             | DG5 | H1'     | 3.2             | 5.15            |
| 1            | DG5 | H8     | 1             | DG5 | H2''    | 3.64            | 6.42            |
| 1            | DG5 | H8     | 1             | DG5 | H2'     | 2.19            | 2.91            |
| 1            | DG5 | H8     | 1             | DG5 | H3'     | 3.00            | 4.00            |
| 1            | DG5 | H8     | 1             | DG5 | H4'     | 4.23            | 4.73            |
| 2            | DT  | H2''   | 2             | DT  | H1'     | 2.05            | 3.11            |
| 2            | DT  | H2'    | 2             | DT  | H1'     | 2.45            | 3.63            |
| 2            | DT  | H3'    | 2             | DT  | H1'     | 3.6             | 4.46            |
| 2            | DT  | H3'    | 2             | DT  | H2''    | 2.47            | 3.72            |
| 2            | DT  | H3'    | 2             | DT  | H2'     | 2.16            | 2.52            |
| 2            | DT  | H4'    | 2             | DT  | H1'     | 2.55            | 2.87            |
| 2            | DT  | H4'    | 2             | DT  | H2'     | 3.42            | 5.15            |
| 2            | DT  | H4'    | 2             | DT  | H3'     | 2.71            | 3.27            |
| 2            | DT  | H6     | 1             | DG5 | H1'     | 3.86            | 4.51            |
| 2            | DT  | H6     | 1             | DG5 | H2''    | 2.35            | 2.79            |
| 2            | DT  | H6     | 1             | DG5 | H3'     | 3.96            | 5.40            |
| 2            | DT  | H6     | 1             | DG5 | H8      | 3.93            | 6.78            |
| 2            | DT  | H6     | 2             | DT  | H1'     | 2.67            | 5.64            |
| 2            | DT  | H6     | 2             | DT  | H2''    | 2.50            | 5.39            |



|   |    |      |   |     |      |      |      |
|---|----|------|---|-----|------|------|------|
| 2 | DT | H6   | 2 | DT  | H2'  | 1.75 | 2.24 |
| 2 | DT | H6   | 2 | DT  | H3'  | 3.42 | 5.02 |
| 2 | DT | ME   | 1 | DG5 | H1'  | 4.91 | 7.21 |
| 2 | DT | ME   | 1 | DG5 | H2'' | 3.70 | 4.13 |
| 2 | DT | ME   | 1 | DG5 | H2'  | 3.15 | 3.65 |
| 2 | DT | ME   | 1 | DG5 | H3'  | 3.94 | 4.36 |
| 2 | DT | ME   | 1 | DG5 | H8   | 3.88 | 4.43 |
| 2 | DT | ME   | 2 | DT  | H2'  | 4.30 | 5.39 |
| 2 | DT | ME   | 2 | DT  | H3'  | 4.85 | 7.89 |
| 3 | DG | H2'' | 3 | DG  | H1'  | 2.08 | 2.58 |
| 3 | DG | H2'  | 3 | DG  | H1'  | 2.26 | 3.73 |
| 3 | DG | H3'  | 3 | DG  | H1'  | 3.16 | 5.16 |
| 3 | DG | H3'  | 3 | DG  | H2'' | 2.23 | 3.87 |
| 3 | DG | H3'  | 3 | DG  | H2'  | 1.99 | 3.76 |
| 3 | DG | H4'  | 3 | DG  | H1'  | 2.85 | 3.22 |
| 3 | DG | H4'  | 3 | DG  | H2'' | 2.95 | 5.03 |
| 3 | DG | H4'  | 3 | DG  | H2'  | 3.48 | 3.98 |
| 3 | DG | H8   | 2 | DT  | H1'  | 3.65 | 4.27 |
| 3 | DG | H8   | 2 | DT  | H2'' | 2.71 | 3.19 |
| 3 | DG | H8   | 2 | DT  | H2'  | 3.26 | 4.91 |
| 3 | DG | H8   | 2 | DT  | H3'  | 4.88 | 6.59 |
| 3 | DG | H8   | 2 | DT  | H6   | 3.91 | 5.8  |
| 3 | DG | H8   | 3 | DG  | H1'  | 3.54 | 5.44 |
| 3 | DG | H8   | 3 | DG  | H2'' | 2.70 | 3.50 |
| 3 | DG | H8   | 3 | DG  | H2'  | 2.21 | 2.79 |
| 3 | DG | H8   | 3 | DG  | H3'  | 3.43 | 5.09 |

|   |     |      |   |     |      |      |      |
|---|-----|------|---|-----|------|------|------|
| 3 | DG  | H8   | 3 | DG  | H4'  | 5.1  | 6.55 |
| 4 | DC  | H2'' | 4 | DG  | H3'  | 2.56 | 3.06 |
| 4 | DC  | H2'' | 4 | DC  | H1'  | 2.04 | 2.50 |
| 4 | DC  | H2'  | 4 | DC  | H1'  | 2.77 | 3.27 |
| 4 | DC  | H3'  | 4 | DC  | H1'  | 3.65 | 5.57 |
| 4 | DC  | H3'  | 4 | DC  | H2'  | 2.28 | 2.72 |
| 4 | DC  | H4'  | 4 | DC  | H2'' | 4.02 | 4.52 |
| 4 | DC  | H4'  | 4 | DC  | H2'  | 3.33 | 3.83 |
| 4 | DC  | H6   | 3 | DG  | H1'  | 3.54 | 5.18 |
| 4 | DC  | H6   | 3 | DG  | H2'' | 2.22 | 3.08 |
| 4 | DC  | H6   | 3 | DG  | H2'  | 2.82 | 5.68 |
| 4 | DC  | H6   | 3 | DG  | H8   | 4.00 | 6.77 |
| 4 | DC  | H6   | 4 | DC  | H1'  | 3.42 | 5.75 |
| 4 | DC  | H6   | 4 | DC  | H2'' | 2.72 | 3.32 |
| 4 | DC  | H6   | 4 | DC  | H2'  | 2.01 | 2.56 |
| 4 | DC  | H6   | 4 | DC  | H4'  | 3.79 | 6.22 |
| 4 | DC  | H5   | 3 | DG  | H1'  | 3.88 | 5.98 |
| 4 | DC  | H5   | 3 | DG  | H2'' | 2.89 | 3.55 |
| 4 | DC  | H5   | 3 | DG  | H2'  | 3.73 | 4.23 |
| 4 | DC  | H5   | 3 | DG  | H8   | 4.35 | 6.12 |
| 4 | DC  | H5   | 4 | DC  | H2'' | 3.51 | 6.19 |
| 4 | DC  | H5   | 4 | DC  | H2'  | 3.00 | 4.96 |
| 5 | CDG | H2'' | 5 | CDG | H1'  | 2.24 | 2.95 |
| 5 | CDG | H2'  | 5 | CDG | H1'  | 2.31 | 2.93 |
| 5 | CDG | H3'  | 5 | CDG | H1'  | 4.16 | 5.38 |
| 5 | CDG | H3'  | 5 | CDG | H2'' | 2.51 | 3.16 |

|   |     |      |   |     |      |      |      |
|---|-----|------|---|-----|------|------|------|
| 5 | CDG | H3'  | 5 | CDG | H2'  | 2.20 | 2.70 |
| 5 | CDG | H4'  | 4 | DC  | H1'  | 4.30 | 5.66 |
| 5 | CDG | H4'  | 4 | DC  | H2'' | 4.25 | 5.50 |
| 5 | CDG | H4'  | 5 | CDG | H1'  | 4.04 | 5.07 |
| 5 | CDG | H4'  | 5 | CDG | H2'' | 3.34 | 4.34 |
| 5 | CDG | H4'  | 5 | CDG | H2'  | 3.79 | 4.24 |
| 5 | CDG | H4'  | 5 | CDG | H3'  | 2.37 | 2.87 |
| 5 | CDG | H5'  | 4 | DC  | H1'  | 2.21 | 2.71 |
| 5 | CDG | H5'  | 4 | DC  | H2'' | 3.23 | 3.58 |
| 5 | CDG | H5'  | 4 | DC  | H2'  | 4.46 | 4.96 |
| 5 | CDG | H5'  | 4 | DC  | H3'  | 4.89 | 5.39 |
| 5 | CDG | H5'  | 5 | CDG | H3'  | 3.72 | 4.14 |
| 5 | CDG | H5'  | 5 | CDG | H4'  | 2.60 | 2.78 |
| 6 | DT  | H2'' | 6 | DT  | H1'  | 2.3  | 2.92 |
| 6 | DT  | H2'  | 6 | DT  | H1'  | 2.51 | 3.15 |
| 6 | DT  | H3'  | 6 | DT  | H1'  | 3.32 | 4.63 |
| 6 | DT  | H3'  | 6 | DT  | H2'  | 2.23 | 2.40 |
| 6 | DT  | H4'  | 5 | CDG | H2'' | 3.5  | 5.84 |
| 6 | DT  | H4'  | 5 | CDG | H2'  | 3.83 | 4.33 |
| 6 | DT  | H4'  | 6 | DT  | H2'' | 3.33 | 4.43 |
| 6 | DT  | H4'  | 6 | DT  | H2'  | 3.09 | 4.53 |
| 6 | DT  | H4'  | 6 | DT  | H3'  | 2.76 | 3.04 |
| 6 | DT  | H6   | 5 | CDG | H1'  | 4.00 | 5.00 |
| 6 | DT  | H6   | 5 | CDG | H2'' | 3.25 | 3.75 |
| 6 | DT  | H6   | 5 | CDG | H3'  | 3.03 | 3.53 |
| 6 | DT  | H6   | 5 | CDG | H5'  | 5.58 | 6.59 |

|   |    |      |   |     |      |      |      |
|---|----|------|---|-----|------|------|------|
| 6 | DT | H6   | 6 | DT  | H1'  | 3.34 | 5.02 |
| 6 | DT | H6   | 6 | DT  | H2'' | 2.67 | 4.52 |
| 6 | DT | H6   | 6 | DT  | H2'  | 1.92 | 2.14 |
| 6 | DT | H6   | 6 | DT  | H3'  | 3.50 | 4.50 |
| 6 | DT | H6   | 6 | DT  | H4'  | 4.33 | 6.04 |
| 6 | DT | ME   | 4 | DC  | H1'  | 5.21 | 6.98 |
| 6 | DT | ME   | 4 | DC  | H2'' | 3.88 | 4.34 |
| 6 | DT | ME   | 4 | DC  | H2'  | 4.48 | 6.26 |
| 6 | DT | ME   | 4 | DC  | H3'  | 5.56 | 7.50 |
| 6 | DT | ME   | 5 | CDG | H1'  | 4.50 | 5.50 |
| 6 | DT | ME   | 5 | CDG | H2'' | 3.71 | 5.10 |
| 6 | DT | ME   | 5 | CDG | H2'  | 3.94 | 4.44 |
| 6 | DT | ME   | 5 | CDG | H3'  | 3.05 | 3.25 |
| 6 | DT | ME   | 5 | CDG | H4'  | 4.97 | 6.13 |
| 6 | DT | ME   | 5 | CDG | H5'  | 4.65 | 5.02 |
| 6 | DT | ME   | 6 | DT  | H2'  | 3.83 | 6.68 |
| 6 | DT | ME   | 6 | DT  | H3'  | 4.53 | 5.58 |
| 7 | DG | H2'' | 7 | DG  | H1'  | 1.93 | 2.32 |
| 7 | DG | H2'  | 7 | DG  | H1'  | 2.51 | 5.11 |
| 7 | DG | H3'  | 7 | DG  | H1'  | 3.52 | 4.09 |
| 7 | DG | H3'  | 7 | DG  | H2'' | 2.34 | 2.78 |
| 7 | DG | H3'  | 7 | DG  | H2'  | 2.34 | 2.95 |
| 7 | DG | H4'  | 7 | DG  | H1'  | 2.93 | 3.18 |
| 7 | DG | H4'  | 7 | DG  | H2'' | 3.32 | 5.21 |
| 7 | DG | H4'  | 7 | DG  | H2'  | 3.70 | 4.99 |
| 7 | DG | H4'  | 7 | DG  | H3'  | 2.85 | 3.04 |

|   |    |      |   |    |      |      |      |
|---|----|------|---|----|------|------|------|
| 7 | DG | H8   | 6 | DT | H1'  | 3.16 | 3.46 |
| 7 | DG | H8   | 6 | DT | H2'' | 2.24 | 2.84 |
| 7 | DG | H8   | 6 | DT | H2'  | 2.95 | 3.77 |
| 7 | DG | H8   | 6 | DT | H3'  | 4.67 | 6.01 |
| 7 | DG | H8   | 6 | DT | H6   | 3.99 | 6.48 |
| 7 | DG | H8   | 7 | DG | H1'  | 3.47 | 4.67 |
| 7 | DG | H8   | 7 | DG | H2'' | 2.87 | 4.87 |
| 7 | DG | H8   | 7 | DG | H2'  | 2.23 | 2.54 |
| 7 | DG | H8   | 7 | DG | H3'  | 3.50 | 4.50 |
| 7 | DG | H8   | 7 | DG | H4'  | 4.54 | 6.52 |
| 8 | DT | H2'' | 8 | DT | H1'  | 2.03 | 2.66 |
| 8 | DT | H2'  | 8 | DT | H1'  | 2.28 | 3.51 |
| 8 | DT | H3'  | 8 | DT | H1'  | 3.46 | 3.96 |
| 8 | DT | H3'  | 8 | DT | H2'' | 2.38 | 3.62 |
| 8 | DT | H3'  | 8 | DT | H2'  | 2.15 | 2.58 |
| 8 | DT | H4'  | 8 | DT | H3'  | 2.58 | 2.82 |
| 8 | DT | H6   | 7 | DG | H1'  | 3.08 | 4.57 |
| 8 | DT | H6   | 7 | DG | H2'' | 2.33 | 2.72 |
| 8 | DT | H6   | 7 | DG | H2'  | 2.91 | 5.24 |
| 8 | DT | H6   | 7 | DG | H3'  | 4.72 | 6.07 |
| 8 | DT | H6   | 7 | DG | H8   | 4.29 | 6.23 |
| 8 | DT | H6   | 8 | DT | H1'  | 3.28 | 4.72 |
| 8 | DT | H6   | 8 | DT | H2'' | 2.45 | 5.19 |
| 8 | DT | H6   | 8 | DT | H2'  | 2.01 | 2.46 |
| 8 | DT | H6   | 8 | DT | H3'  | 4.14 | 4.64 |
| 8 | DT | H6   | 8 | DT | H4'  | 3.93 | 5.73 |

|   |    |      |   |    |      |      |      |
|---|----|------|---|----|------|------|------|
| 8 | DT | ME   | 7 | DG | H1'  | 4.15 | 5.13 |
| 8 | DT | ME   | 7 | DG | H2'' | 3.51 | 3.91 |
| 8 | DT | ME   | 7 | DG | H2'  | 3.32 | 3.82 |
| 8 | DT | ME   | 7 | DG | H3'  | 4.19 | 4.67 |
| 8 | DT | ME   | 7 | DG | H8   | 3.51 | 3.78 |
| 8 | DT | ME   | 8 | DT | H2'  | 4.68 | 5.40 |
| 8 | DT | ME   | 8 | DT | H3'  | 5.05 | 6.66 |
| 9 | DT | H2'' | 9 | DT | H1'  | 2.26 | 2.76 |
| 9 | DT | H2'  | 9 | DT | H1'  | 2.00 | 3.00 |
| 9 | DT | H3'  | 9 | DT | H1'  | 3.22 | 4.49 |
| 9 | DT | H3'  | 9 | DT | H2'' | 2.39 | 3.55 |
| 9 | DT | H3'  | 9 | DT | H2'  | 2.14 | 2.68 |
| 9 | DT | H6   | 8 | DT | H1'  | 4.54 | 5.10 |
| 9 | DT | H6   | 8 | DT | H2'  | 2.37 | 4.87 |
| 9 | DT | H6   | 8 | DT | H3'  | 3.40 | 6.54 |
| 9 | DT | H6   | 8 | DT | H6   | 3.42 | 6.42 |
| 9 | DT | H6   | 9 | DT | H1'  | 3.24 | 4.52 |
| 9 | DT | H6   | 9 | DT | H2'  | 2.11 | 2.61 |
| 9 | DT | H6   | 9 | DT | H3'  | 3.23 | 4.97 |
| 9 | DT | ME   | 8 | DT | H1'  | 4.11 | 5.03 |
| 9 | DT | ME   | 8 | DT | H2'' | 3.21 | 4.62 |
| 9 | DT | ME   | 8 | DT | H2'  | 3.11 | 3.62 |
| 9 | DT | ME   | 8 | DT | H3'  | 4.24 | 6.08 |
| 9 | DT | ME   | 8 | DT | H6   | 3.67 | 4.24 |
| 9 | DT | ME   | 9 | DT | H2'  | 3.38 | 4.89 |
| 9 | DT | ME   | 9 | DT | H3'  | 4.78 | 6.02 |

|    |    |      |    |    |      |      |      |
|----|----|------|----|----|------|------|------|
| 10 | DT | H2'' | 10 | DT | H1'  | 1.95 | 2.29 |
| 10 | DT | H2'  | 10 | DT | H1'  | 2.50 | 3.50 |
| 10 | DT | H3'  | 10 | DT | H1'  | 3.63 | 5.37 |
| 10 | DT | H3'  | 10 | DT | H2'' | 2.53 | 2.81 |
| 10 | DT | H3'  | 10 | DT | H2'  | 2.27 | 2.66 |
| 10 | DT | H6   | 9  | DT | H1'  | 3.71 | 4.41 |
| 10 | DT | H6   | 9  | DT | H2'' | 2.22 | 2.81 |
| 10 | DT | H6   | 9  | DT | H2'  | 2.97 | 4.21 |
| 10 | DT | H6   | 10 | DT | H1'  | 3.41 | 4.22 |
| 10 | DT | H6   | 10 | DT | H2'  | 2.33 | 2.88 |
| 10 | DT | ME   | 9  | DT | H1'  | 4.36 | 5.57 |
| 10 | DT | ME   | 9  | DT | H2'' | 3.62 | 4.38 |
| 10 | DT | ME   | 9  | DT | H2'  | 3.37 | 3.61 |
| 10 | DT | ME   | 9  | DT | H3'  | 4.19 | 4.91 |
| 10 | DT | ME   | 9  | DT | H6   | 3.54 | 3.75 |
| 10 | DT | ME   | 10 | DT | H2'  | 3.79 | 5.16 |
| 11 | DG | H2'  | 11 | DG | H1'  | 2.38 | 2.88 |
| 11 | DG | H3'  | 11 | DG | H1'  | 3.78 | 5.06 |
| 11 | DG | H3'  | 11 | DG | H2'  | 2.41 | 2.82 |
| 11 | DG | H4'  | 11 | DG | H1'  | 3.02 | 3.52 |
| 11 | DG | H4'  | 11 | DG | H2'  | 3.61 | 4.18 |
| 11 | DG | H4'  | 11 | DG | H3'  | 2.69 | 3.48 |
| 11 | DG | H8   | 10 | DT | H1'  | 3.81 | 4.51 |
| 11 | DG | H8   | 10 | DT | H2'' | 2.31 | 2.96 |
| 11 | DG | H8   | 10 | DT | H2'  | 2.95 | 3.45 |
| 11 | DG | H8   | 10 | DT | H3'  | 4.23 | 4.93 |

|    |     |      |    |     |     |      |      |
|----|-----|------|----|-----|-----|------|------|
| 11 | DG  | H8   | 10 | DT  | H6  | 4.86 | 6.14 |
| 11 | DG  | H8   | 11 | DG  | H1' | 3.51 | 4.01 |
| 11 | DG  | H8   | 11 | DG  | H2' | 2.55 | 3.14 |
| 11 | DG  | H8   | 11 | DG  | H3' | 3.39 | 4.36 |
| 11 | DG  | H8   | 11 | DG  | H4' | 4.75 | 6.58 |
| 12 | DT3 | H2'  | 12 | DT3 | H1' | 2.53 | 2.67 |
| 12 | DT3 | H3'  | 12 | DT3 | H1' | 3.00 | 4.00 |
| 12 | DT3 | H3'  | 12 | DT3 | H2' | 2.59 | 2.82 |
| 12 | DT3 | H4'  | 12 | DT3 | H1' | 2.6  | 3.12 |
| 12 | DT3 | H4'  | 12 | DT3 | H3' | 2.72 | 3.22 |
| 12 | DT3 | H6   | 11 | DG  | H1' | 3.69 | 4.19 |
| 12 | DT3 | H6   | 11 | DG  | H2' | 3.14 | 3.69 |
| 12 | DT3 | H6   | 11 | DG  | H3' | 4.53 | 6.40 |
| 12 | DT3 | H6   | 11 | DG  | H8  | 4.06 | 5.44 |
| 12 | DT3 | H6   | 12 | DT3 | H1' | 3.62 | 5.68 |
| 12 | DT3 | H6   | 12 | DT3 | H2' | 2.98 | 3.41 |
| 12 | DT3 | H6   | 12 | DT3 | H3' | 2.99 | 3.21 |
| 12 | DT3 | ME   | 11 | DG  | H1' | 5.04 | 5.89 |
| 12 | DT3 | ME   | 11 | DG  | H2' | 3.79 | 4.15 |
| 12 | DT3 | ME   | 11 | DG  | H3' | 4.9  | 5.86 |
| 12 | DT3 | ME   | 11 | DG  | H8  | 3.91 | 4.22 |
| 12 | DT3 | ME   | 12 | DT3 | H2' | 5.00 | 6.00 |
| 12 | DT3 | ME   | 12 | DT3 | H3' | 5.47 | 7.61 |
| 13 | DA5 | H2'' | 13 | DA5 | H1' | 1.95 | 2.34 |
| 13 | DA5 | H2'  | 13 | DA5 | H1' | 2.47 | 5.44 |
| 13 | DA5 | H3'  | 13 | DA5 | H1' | 3.88 | 5.54 |



|    |     |      |    |     |      |      |      |
|----|-----|------|----|-----|------|------|------|
| 13 | DA5 | H3'  | 13 | DA5 | H2'' | 2.36 | 3.50 |
| 13 | DA5 | H3'  | 13 | DA5 | H2'  | 2.14 | 3.28 |
| 13 | DA5 | H4'  | 13 | DA5 | H1'  | 3.07 | 3.37 |
| 13 | DA5 | H4'  | 13 | DA5 | H3'  | 2.33 | 2.89 |
| 13 | DA5 | H8   | 13 | DA5 | H1'  | 3.53 | 4.03 |
| 13 | DA5 | H8   | 13 | DA5 | H2'' | 2.71 | 4.03 |
| 13 | DA5 | H8   | 13 | DA5 | H2'  | 2.48 | 3.06 |
| 13 | DA5 | H8   | 13 | DA5 | H3'  | 3.00 | 4.00 |
| 13 | DA5 | H8   | 13 | DA5 | H4'  | 4.00 | 5.00 |
| 14 | DC  | H2'' | 14 | DC  | H1'  | 2.02 | 2.37 |
| 14 | DC  | H2'  | 14 | DC  | H1'  | 2.64 | 3.14 |
| 14 | DC  | H3'  | 14 | DC  | H2'' | 2.39 | 3.07 |
| 14 | DC  | H3'  | 14 | DC  | H2'  | 2.22 | 2.72 |
| 14 | DC  | H6   | 13 | DA5 | H1'  | 4.06 | 4.51 |
| 14 | DC  | H6   | 13 | DA5 | H2'' | 2.47 | 3.02 |
| 14 | DC  | H6   | 13 | DA5 | H2'  | 2.52 | 3.49 |
| 14 | DC  | H6   | 13 | DA5 | H3'  | 4.71 | 6.21 |
| 14 | DC  | H6   | 13 | DA5 | H8   | 4.50 | 5.50 |
| 14 | DC  | H6   | 14 | DC  | H1'  | 2.62 | 3.91 |
| 14 | DC  | H6   | 14 | DC  | H2'' | 2.81 | 4.6  |
| 14 | DC  | H6   | 14 | DC  | H2'  | 1.77 | 2.21 |
| 14 | DC  | H5   | 13 | DA5 | H2'' | 3.50 | 5.21 |
| 14 | DC  | H5   | 13 | DA5 | H2'  | 3.16 | 3.93 |
| 14 | DC  | H5   | 13 | DA5 | H8   | 4.31 | 6.75 |
| 14 | DC  | H5   | 14 | DC  | H2'' | 3.22 | 5.86 |
| 14 | DC  | H5   | 14 | DC  | H2'  | 3.04 | 6.14 |

|    |    |      |    |    |      |      |      |
|----|----|------|----|----|------|------|------|
| 15 | DA | H2'' | 15 | DA | H1'  | 1.92 | 2.42 |
| 15 | DA | H2'  | 15 | DA | H1'  | 2.59 | 5.09 |
| 15 | DA | H3'  | 15 | DA | H1'  | 3.25 | 5.08 |
| 15 | DA | H3'  | 15 | DA | H2'' | 2.31 | 3.18 |
| 15 | DA | H3'  | 15 | DA | H2'  | 2.24 | 2.82 |
| 15 | DA | H4'  | 15 | DA | H1'  | 3.07 | 3.40 |
| 15 | DA | H4'  | 15 | DA | H2'' | 3.08 | 4.99 |
| 15 | DA | H4'  | 15 | DA | H2'  | 2.99 | 4.60 |
| 15 | DA | H4'  | 15 | DA | H3'  | 2.60 | 2.76 |
| 15 | DA | H8   | 14 | DC | H1'  | 3.71 | 4.26 |
| 15 | DA | H8   | 14 | DC | H2'' | 2.66 | 3.16 |
| 15 | DA | H8   | 14 | DC | H2'  | 3.78 | 4.78 |
| 15 | DA | H8   | 14 | DC | H6   | 4.75 | 6.30 |
| 15 | DA | H8   | 15 | DA | H1'  | 3.61 | 5.40 |
| 15 | DA | H8   | 15 | DA | H2'' | 2.92 | 3.38 |
| 15 | DA | H8   | 15 | DA | H2'  | 2.04 | 2.54 |
| 15 | DA | H8   | 15 | DA | H3'  | 3.54 | 5.47 |
| 15 | DA | H8   | 15 | DA | H4'  | 5.09 | 6.76 |
| 16 | DA | H2'' | 16 | DA | H1'  | 2.06 | 2.44 |
| 16 | DA | H2'  | 16 | DA | H1'  | 2.35 | 4.64 |
| 16 | DA | H3'  | 16 | DA | H1'  | 3.49 | 3.97 |
| 16 | DA | H3'  | 16 | DA | H2'' | 2.50 | 3.50 |
| 16 | DA | H3'  | 16 | DA | H2'  | 2.09 | 2.45 |
| 16 | DA | H4'  | 16 | DA | H1'  | 2.97 | 3.11 |
| 16 | DA | H4'  | 16 | DA | H2'  | 3.50 | 5.70 |
| 16 | DA | H4'  | 16 | DA | H3'  | 2.82 | 2.96 |

|    |    |      |    |    |      |      |      |
|----|----|------|----|----|------|------|------|
| 16 | DA | H8   | 15 | DA | H1'  | 3.23 | 3.74 |
| 16 | DA | H8   | 15 | DA | H2'  | 2.67 | 3.37 |
| 16 | DA | H8   | 15 | DA | H3'  | 4.19 | 5.98 |
| 16 | DA | H8   | 16 | DA | H1'  | 3.48 | 5.15 |
| 16 | DA | H8   | 16 | DA | H2'' | 2.26 | 4.70 |
| 16 | DA | H8   | 16 | DA | H2'  | 2.11 | 2.48 |
| 16 | DA | H8   | 16 | DA | H3'  | 3.39 | 5.96 |
| 16 | DA | H8   | 16 | DA | H4'  | 4.50 | 5.50 |
| 17 | DA | H2'' | 17 | DA | H1'  | 2.15 | 2.65 |
| 17 | DA | H2'  | 17 | DA | H1'  | 2.47 | 4.20 |
| 17 | DA | H3'  | 17 | DA | H1'  | 3.87 | 5.56 |
| 17 | DA | H3'  | 17 | DA | H2'' | 2.72 | 4.81 |
| 17 | DA | H3'  | 17 | DA | H2'  | 2.17 | 2.86 |
| 17 | DA | H4'  | 17 | DA | H1'  | 3.20 | 3.59 |
| 17 | DA | H4'  | 17 | DA | H2'  | 3.45 | 4.04 |
| 17 | DA | H4'  | 17 | DA | H3'  | 2.86 | 3.36 |
| 17 | DA | H8   | 16 | DA | H1'  | 3.20 | 3.79 |
| 17 | DA | H8   | 16 | DA | H2'  | 2.83 | 3.32 |
| 17 | DA | H8   | 16 | DA | H3'  | 3.96 | 4.65 |
| 17 | DA | H8   | 17 | DA | H1'  | 3.50 | 5.26 |
| 17 | DA | H8   | 17 | DA | H2'' | 2.60 | 5.60 |
| 17 | DA | H8   | 17 | DA | H2'  | 2.04 | 2.52 |
| 17 | DA | H8   | 17 | DA | H3'  | 3.42 | 4.58 |
| 17 | DA | H8   | 17 | DA | H4'  | 4.42 | 6.24 |
| 18 | DC | H1'  | 17 | DA | H2   | 3.49 | 3.68 |
| 18 | DC | H2'' | 18 | DC | H1'  | 1.95 | 2.32 |

|    |    |      |    |    |      |      |      |
|----|----|------|----|----|------|------|------|
| 18 | DC | H2'  | 18 | DC | H1'  | 2.50 | 3.50 |
| 18 | DC | H6   | 17 | DA | H1'  | 3.25 | 4.05 |
| 18 | DC | H6   | 17 | DA | H2'' | 2.48 | 3.00 |
| 18 | DC | H6   | 17 | DA | H2'  | 2.90 | 3.72 |
| 18 | DC | H6   | 17 | DA | H3'  | 3.94 | 5.60 |
| 18 | DC | H6   | 17 | DA | H8   | 4.38 | 4.88 |
| 18 | DC | H6   | 18 | DC | H1'  | 2.64 | 3.70 |
| 18 | DC | H6   | 18 | DC | H2'' | 2.50 | 3.50 |
| 18 | DC | H5   | 17 | DA | H2'' | 3.86 | 4.36 |
| 18 | DC | H5   | 17 | DA | H2'  | 3.51 | 4.21 |
| 18 | DC | H5   | 17 | DA | H8   | 3.99 | 4.57 |
| 18 | DC | H5   | 18 | DC | H2'  | 3.50 | 4.50 |
| 19 | DA | H2'' | 19 | DA | H1'  | 1.99 | 2.55 |
| 19 | DA | H2'  | 19 | DA | H1'  | 2.35 | 4.52 |
| 19 | DA | H3'  | 19 | DA | H1'  | 3.46 | 5.12 |
| 19 | DA | H3'  | 19 | DA | H2'' | 2.49 | 4.65 |
| 19 | DA | H3'  | 19 | DA | H2'  | 2.09 | 2.45 |
| 19 | DA | H4'  | 18 | DC | H2'' | 4.57 | 5.64 |
| 19 | DA | H4'  | 19 | DA | H2'' | 3.10 | 3.80 |
| 19 | DA | H4'  | 19 | DA | H2'  | 3.46 | 5.78 |
| 19 | DA | H4'  | 19 | DA | H3'  | 2.84 | 3.52 |
| 19 | DA | H8   | 18 | DC | H1'  | 3.53 | 4.27 |
| 19 | DA | H8   | 18 | DC | H2'' | 2.53 | 2.93 |
| 19 | DA | H8   | 18 | DC | H2'  | 2.74 | 3.38 |
| 19 | DA | H8   | 19 | DA | H1'  | 3.45 | 3.98 |
| 19 | DA | H8   | 19 | DA | H2'' | 3.19 | 3.67 |

|    |    |      |    |    |      |      |      |
|----|----|------|----|----|------|------|------|
| 19 | DA | H8   | 19 | DA | H2'  | 2.01 | 2.58 |
| 19 | DA | H8   | 19 | DA | H3'  | 3.56 | 5.28 |
| 19 | DA | H8   | 19 | DA | H4'  | 4.36 | 6.19 |
| 20 | DC | H2'' | 20 | DC | H1'  | 2.11 | 2.58 |
| 20 | DC | H2'  | 20 | DC | H1'  | 3.09 | 4.75 |
| 20 | DC | H3'  | 20 | DC | H2'' | 2.38 | 3.11 |
| 20 | DC | H3'  | 20 | DC | H2'  | 2.41 | 3.72 |
| 20 | DC | H6   | 19 | DA | H1'  | 3.24 | 4.10 |
| 20 | DC | H6   | 19 | DA | H2'' | 2.24 | 2.86 |
| 20 | DC | H6   | 19 | DA | H2'  | 2.57 | 4.15 |
| 20 | DC | H6   | 19 | DA | H3'  | 3.50 | 6.31 |
| 20 | DC | H6   | 20 | DC | H1'  | 3.21 | 3.78 |
| 20 | DC | H6   | 20 | DC | H2'' | 2.18 | 5.43 |
| 20 | DC | H5   | 19 | DA | H2'' | 3.64 | 4.69 |
| 20 | DC | H5   | 19 | DA | H2'  | 2.98 | 4.31 |
| 20 | DC | H5   | 19 | DA | H8   | 3.79 | 4.63 |
| 20 | DC | H5   | 20 | DC | H2'' | 4.76 | 5.22 |
| 20 | DC | H5   | 20 | DC | H2'  | 3.70 | 5.96 |
| 21 | DG | H2'' | 21 | DG | H1'  | 1.85 | 2.35 |
| 21 | DG | H2'  | 21 | DG | H1'  | 2.27 | 4.97 |
| 21 | DG | H3'  | 21 | DG | H1'  | 3.66 | 5.72 |
| 21 | DG | H3'  | 21 | DG | H2'  | 2.02 | 2.52 |
| 21 | DG | H4'  | 21 | DG | H1'  | 3.15 | 3.37 |
| 21 | DG | H4'  | 21 | DG | H3'  | 2.86 | 3.39 |
| 21 | DG | H8   | 20 | DC | H1'  | 3.55 | 4.43 |
| 21 | DG | H8   | 20 | DC | H2'' | 2.31 | 2.82 |

|    |    |      |    |    |      |      |      |
|----|----|------|----|----|------|------|------|
| 21 | DG | H8   | 20 | DC | H2'  | 3.75 | 5.29 |
| 21 | DG | H8   | 20 | DC | H6   | 4.88 | 5.38 |
| 21 | DG | H8   | 21 | DG | H1'  | 3.41 | 5.94 |
| 21 | DG | H8   | 21 | DG | H2'' | 2.36 | 4.23 |
| 21 | DG | H8   | 21 | DG | H2'  | 2.09 | 2.55 |
| 21 | DG | H8   | 21 | DG | H3'  | 3.44 | 4.80 |
| 21 | DG | H8   | 21 | DG | H4'  | 4.35 | 6.07 |
| 22 | DC | H2'' | 22 | DC | H1'  | 1.98 | 2.27 |
| 22 | DC | H2'  | 22 | DC | H1'  | 2.50 | 3.50 |
| 22 | DC | H3'  | 22 | DC | H1'  | 3.80 | 4.30 |
| 22 | DC | H3'  | 22 | DC | H2'' | 2.81 | 3.38 |
| 22 | DC | H3'  | 22 | DC | H2'  | 2.39 | 2.61 |
| 22 | DC | H6   | 21 | DG | H1'  | 3.49 | 4.24 |
| 22 | DC | H6   | 21 | DG | H2'' | 2.13 | 2.73 |
| 22 | DC | H6   | 21 | DG | H2'  | 2.94 | 5.87 |
| 22 | DC | H6   | 21 | DG | H8   | 3.56 | 6.17 |
| 22 | DC | H6   | 22 | DC | H1'  | 3.33 | 4.25 |
| 22 | DC | H6   | 22 | DC | H2'  | 2.09 | 2.72 |
| 22 | DC | H6   | 22 | DC | H3'  | 3.66 | 5.25 |
| 22 | DC | H5   | 21 | DG | H1'  | 3.96 | 5.52 |
| 22 | DC | H5   | 21 | DG | H2'' | 3.31 | 4.63 |
| 22 | DC | H5   | 21 | DG | H2'  | 3.01 | 3.58 |
| 22 | DC | H5   | 21 | DG | H3'  | 4.86 | 6.79 |
| 22 | DC | H5   | 21 | DG | H8   | 3.65 | 4.52 |
| 22 | DC | H5   | 22 | DC | H2'' | 5.00 | 6.00 |
| 22 | DC | H5   | 22 | DC | H2'  | 3.43 | 4.42 |

|    |     |      |    |     |      |      |      |
|----|-----|------|----|-----|------|------|------|
| 23 | DA  | H2'' | 23 | DA  | H1'  | 1.97 | 2.35 |
| 23 | DA  | H2'  | 23 | DA  | H1'  | 2.99 | 5.07 |
| 23 | DA  | H3'  | 23 | DA  | H1'  | 3.20 | 3.83 |
| 23 | DA  | H3'  | 23 | DA  | H2'' | 2.79 | 5.57 |
| 23 | DA  | H3'  | 23 | DA  | H2'  | 2.12 | 2.71 |
| 23 | DA  | H4'  | 23 | DA  | H1'  | 2.83 | 3.31 |
| 23 | DA  | H4'  | 23 | DA  | H2'' | 3.21 | 4.16 |
| 23 | DA  | H4'  | 23 | DA  | H2'  | 3.61 | 4.11 |
| 23 | DA  | H8   | 22 | DC  | H1'  | 3.54 | 4.08 |
| 23 | DA  | H8   | 22 | DC  | H2'' | 2.40 | 2.90 |
| 23 | DA  | H8   | 22 | DC  | H2'  | 3.22 | 3.74 |
| 23 | DA  | H8   | 22 | DC  | H3'  | 4.96 | 6.72 |
| 23 | DA  | H8   | 22 | DC  | H6   | 4.23 | 6.36 |
| 23 | DA  | H8   | 23 | DA  | H1'  | 3.20 | 4.59 |
| 23 | DA  | H8   | 23 | DA  | H2'' | 2.93 | 5.48 |
| 23 | DA  | H8   | 23 | DA  | H2'  | 2.06 | 2.35 |
| 23 | DA  | H8   | 23 | DA  | H3'  | 3.36 | 5.48 |
| 23 | DA  | H8   | 23 | DA  | H4'  | 4.55 | 6.23 |
| 24 | DC3 | H2'' | 24 | DC3 | H1'  | 2.23 | 3.06 |
| 24 | DC3 | H2'  | 24 | DC3 | H1'  | 2.51 | 4.17 |
| 24 | DC3 | H3'  | 24 | DC3 | H1'  | 3.45 | 4.35 |
| 24 | DC3 | H3'  | 24 | DC3 | H2'' | 2.00 | 3.00 |
| 24 | DC3 | H3'  | 24 | DC3 | H2'  | 1.98 | 2.81 |
| 24 | DC3 | H4'  | 24 | DC3 | H2'' | 3.00 | 4.96 |
| 24 | DC3 | H4'  | 24 | DC3 | H2'  | 3.28 | 4.89 |
| 24 | DC3 | H6   | 23 | DA  | H1'  | 3.29 | 4.34 |

|    |     |    |    |     |      |      |      |
|----|-----|----|----|-----|------|------|------|
| 24 | DC3 | H6 | 23 | DA  | H2'' | 2.69 | 2.97 |
| 24 | DC3 | H6 | 23 | DA  | H3'  | 4.22 | 6.43 |
| 24 | DC3 | H6 | 23 | DA  | H8   | 4.10 | 6.12 |
| 24 | DC3 | H6 | 24 | DC3 | H1'  | 3.38 | 3.95 |
| 24 | DC3 | H6 | 24 | DC3 | H2'' | 2.71 | 5.00 |
| 24 | DC3 | H6 | 24 | DC3 | H2'  | 2.21 | 2.78 |
| 24 | DC3 | H6 | 24 | DC3 | H3'  | 2.88 | 3.58 |
| 24 | DC3 | H5 | 23 | DA  | H2'' | 3.14 | 4.45 |
| 24 | DC3 | H5 | 23 | DA  | H2'  | 3.24 | 5.57 |
| 24 | DC3 | H5 | 23 | DA  | H8   | 3.51 | 3.91 |
| 24 | DC3 | H5 | 24 | DC3 | H2'' | 3.00 | 5.70 |
| 24 | DC3 | H5 | 24 | DC3 | H2'  | 3.42 | 5.50 |



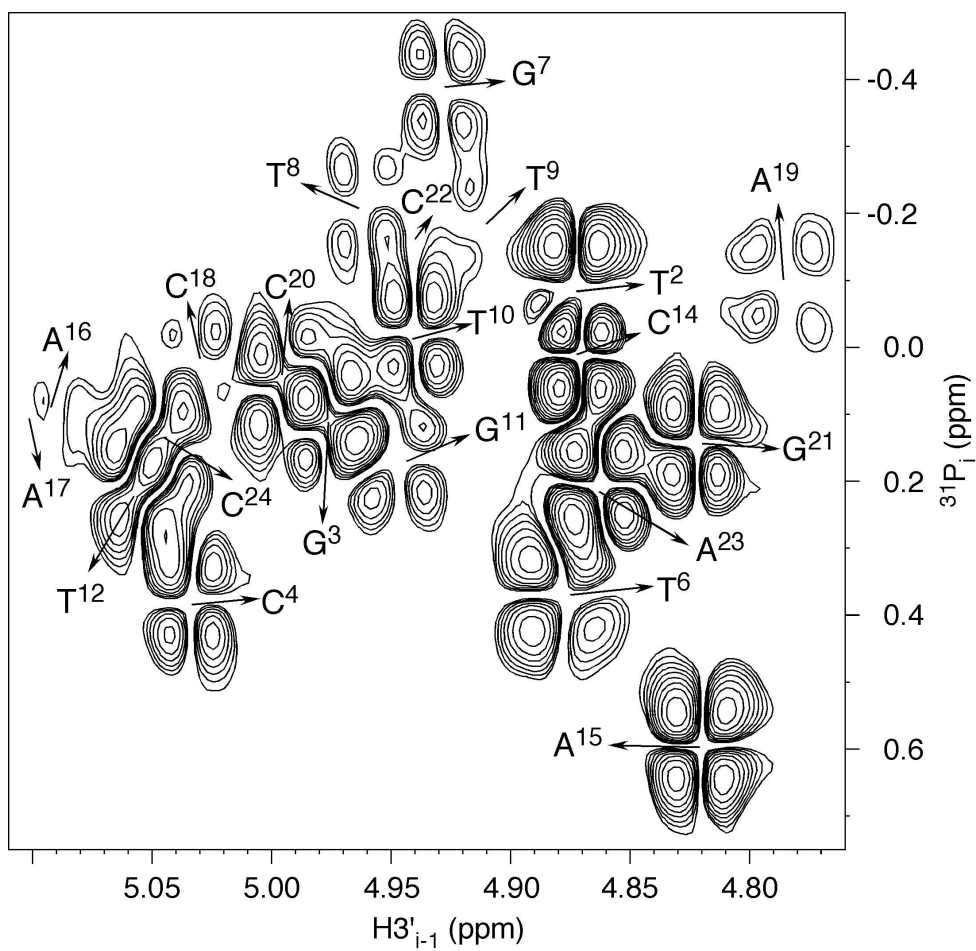

**Figure S1.**  $^{31}\text{P}$ - $\text{H}3'$  HMBC spectrum showing the assignment of the  $^{31}\text{P}$  resonances.

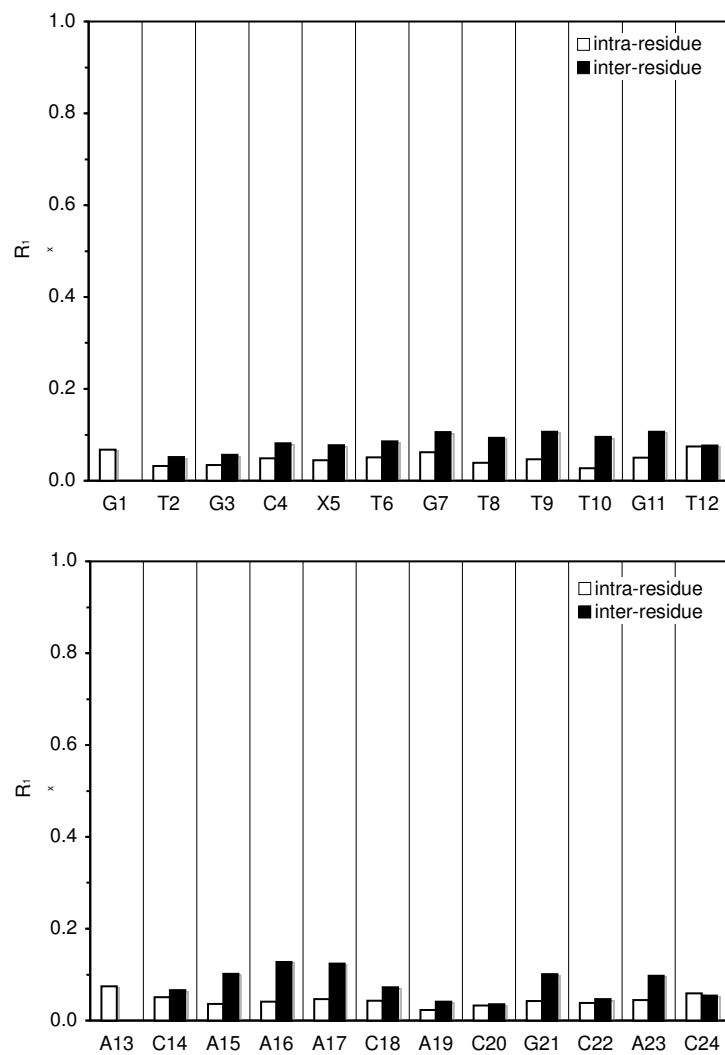

**Figure S2.** Nucleotide-by-nucleotide sixth-root residuals ( $R_1^x$ ) for the refined structure obtained by CORMA calculation.

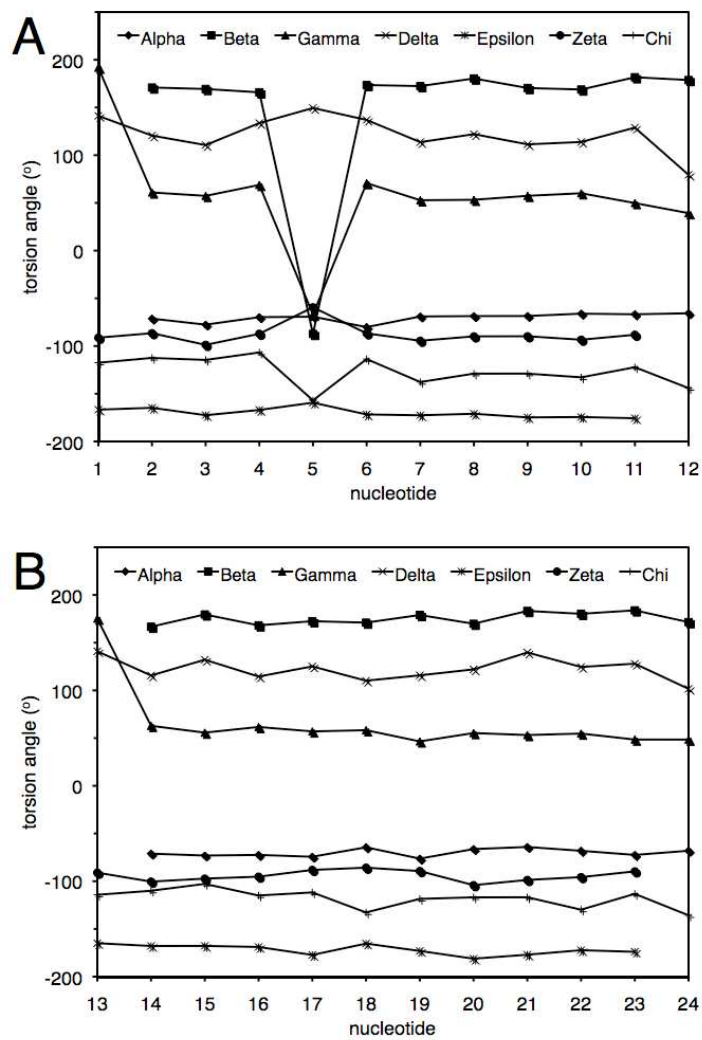

**Figure S3.** Backbone torsion angles of the refined structure of the *S*-cdG containing duplex. **A.** Modified strand. **B.** Complementary strand.

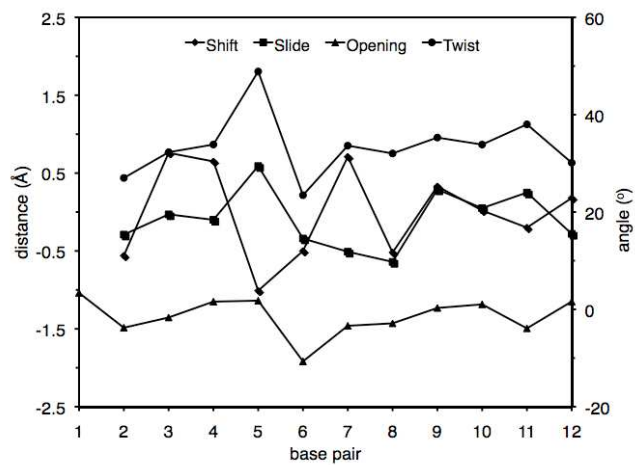

**Figure S4.** Base pairing and base stacking parameters of the refined structure of the S-cdG containing duplex.

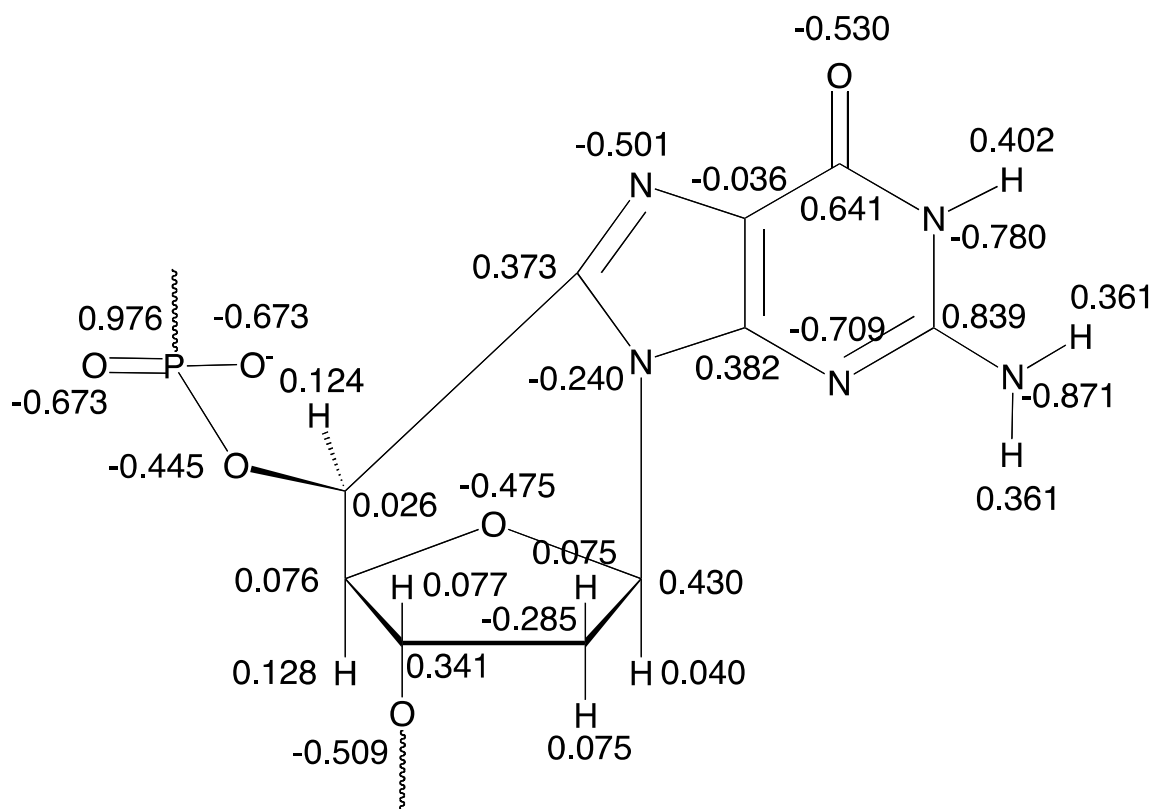

**Figure S5.** Partial charges of the *S*-cdG 5'-phosphate nucleotide.
